# Supplementary material for: Perivascular tenascin C triggers sequential activation of macrophages and endothelial cells to generate a pro-metastatic vascular niche in the lungs
Source: PubMed Central journal article supplement (PMC9046090; doi:10.1038/s43018-022-00353-6), 2022-04-25

# Source data

## Related to Fig. 5b

Uncropped western blot images for caspase 3, cleaved caspase 3 and vinculin. Red boxes indicate the area used for figure.

### Caspase 3 and Cleaved caspase 3

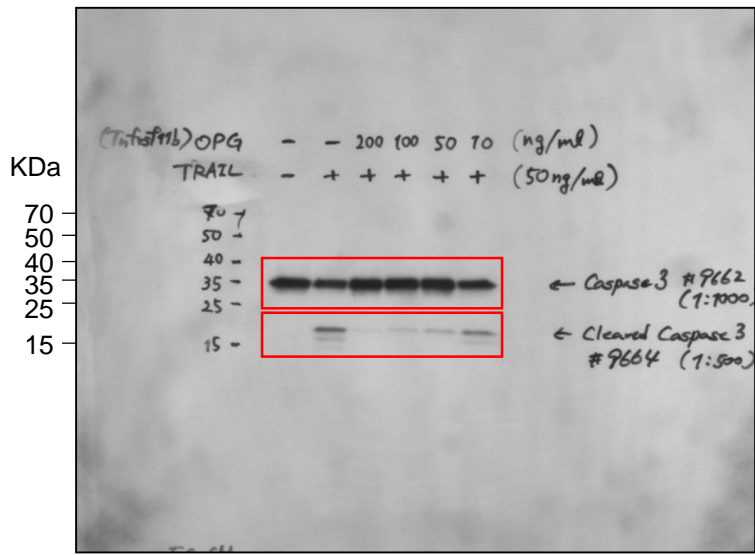

### Vinculin

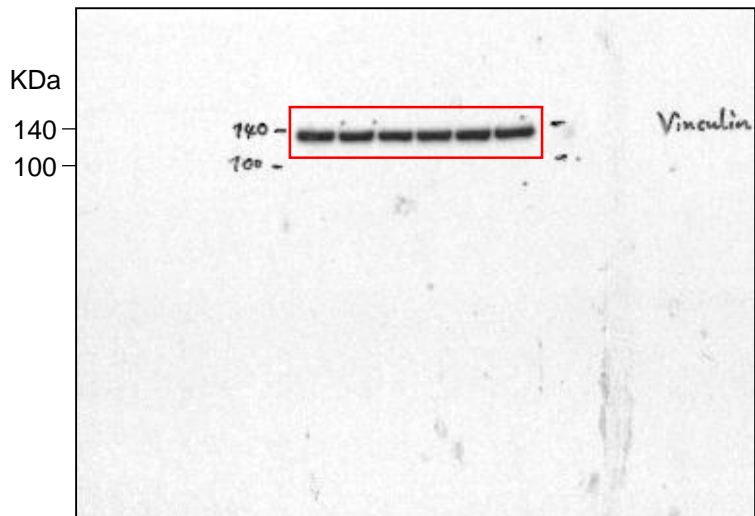

Supplement: 43018_2022_353_MOESM8_ESM.pdf [file 43018_2022_353_MOESM8_ESM.pdf]
